# Supplementary material
Source: MDPI journal article supplement (https://www.mdpi.com/2221-3759/11/3/35)
Supplement: s1 [file s1]

h MAGLTA AAPRPGVLLLLLSILHPSRPGGVPGAIPGGVPGGVFYFPGAGLG-----ALGGG  
p --MASCKLLWTLHALLTLCLLRTSLQGGVPGAGAGGLYG-ALYPGGVHGGYKPKGAAGIG  
:. . \*\* \*.:\*: \* \*\*\*\*\* .\*\*: \* .:\*\*\*. \* \* \* \*

h ALPGGKPLKPVPGGLAGAGLGAG-LGAFP-----AVTFPGALVPGGVADAAAAYK  
p AGGLGAGGLGAIPGAGVGTGIGAGGLGVIPGAGLGTGLGAGVGAGGLIPGLAAGTGIGVK  
\* \* \* . \* .:\*\*\*. .\*:\*:\*\*\* \*\*.:\* \* . .\*:\*\*\* .\*:.. . \*

h AAKAGAGLGGVPGVGGLG-----  
p PPKLGAGIGGLGGLGGVPGGLGGLGGVPGGLGGFGGVPGGLGGFGGIPGGLGGLGGIPGG  
..\* \*\*\*:\*\*: \*:\*\*:

h -----  
p LGGLGGIPGGLGGLGGIPGGLGGLGGLGVGQYPGGVKPKPVPGTGVGVPGTGVGGTGIGG  
h -----VSAGAVVPQP-----GAGVKPGK-VPGVGLPGVYPGGVLPG----ARFPGV  
p VGTGVQPGVSSGAVIPQTGAQPGVGAAGKPKQLPGVGIPGVYPGGFIPGPGGLLPGTGV  
\*\*.:\*\*\*:\*. \*\* .\*\*\* :\*\*\*\*:\*\*\*\*\*.:\*\* .\*\*

h GVLPGVPTGAGVKPKAPGVGGAFAFAGIPGVGPFGGPQPGVPLGYPIKAPKLPGGYGLPYTT  
p GVLPGVPTGTGIGKQKVPGAGGTVAGVPGVGGFGGQPGVPLGYPIKTPKLPGGYGLPYSS  
\*\*\*\*\*.:\*: \* \*\*.\*\*:\*\*:\*\*\* \*\* \*\*\*\*\*:\*\*\*\*\*.:\*

h GKLPYGYGPGGVAG--AAGKAGYPTGTGVGPQAAAAAAKAAAKFGAGAAGVLPGVGGA  
p GKLPYGFGTGAGIGGVPAGLPGFPTGTGAGAQAAAAKAAAKYAGAGR--YPGVG--  
\*\*\*\*\*.:\*. \* \*\*.\*\*:\*\*\*. \*.\*\*\*\*\* \*\* \*\*\*:\*\*\*. \*\*\*\*

h GVPGVPGAIPGIGGIAGVGTAAAAAATAAKAYGAAAGLVPGGPGFGPGVGVPG--  
p SIGGVPLVPGVG--LGGGLVPGAGAGGRYPGVGSIGGVPLVPGVGLGGGLVPGAVPGA  
.: \*\*\*\* :\*\*: \* \* \* ..\*.\*. . ... \*..\*\*\*\*\* \* \* \* .

h ---AGVPGVGVPGAGIPVVPAGIPG--AAVPGVVSPEAAAKAAAKYGARPGVGVG  
p VSAKAAYGYGIPGAGVAGLPGVVPAGVGRLPGFVPGVGVPGAGVVPGTGIVPGAGIG  
\* . \* \*:\*\*\*:.. :\*\*. . . :\*\*\*. ... \*. . \* \*\*.\*:

h GIPTYGVGAGGFPFGFVGVGIGIPGVAGVPSVGGVPGVGGVPGVGISPEAQAAAAKAAKY  
p ISPKAGVVPAGAGIGVSPGAGVVPGTGVGVVPGTGVGVVPGTGVGVVPGTGVGVVPGTGVG  
\* . \*\* \*. \*.. \*. \* :\*\*\*. \* \*\* .\*\*\*: \* : ..... :.

h GVG--TPAAAAAATAAKAAQFGLVPGVGVAPGVGVAPGVGLAPGVGVAPGVGVA  
p VVPGTGVGAVPGAGLVSPKAGVVPGVGVPGAGVGIGS-VIPGVGVVPGVGVVPAGVV  
\* .\*. . . .:.: \*:\*\*\*\*\*.\*\*\*. \* \* \* \*\*\*\*:\*\*\*\*\*.\*\*\*. \*

h PGVGVAPGIGPGGVAAAAKSAAKVAAKAQLRAAGLGAGIPGLGVGVGPGLGVGAGVPG  
p PGVGVVPGTGTIGVVPGTGVGAVPGAGVGVSPKAVLP--VQPGVLVQPSGTVTSVSGATPA  
\*\*\*\*\*. \* \* \* \*..:.. \*. \* . . \* \*\* : \* . \*.....\*

h LGVGAGVPGFGAGADEGVRRSLSPELREGDPSSSQHLPSTPSSPRVPGALAAAKAYGA  
p PGAANGTVIHGGVAGTGVVQPGVGVVQPG-VGGVAPGAVVPGAGVGVGGVGVGAGKP  
\*.. \* . \*. \* \* \* :. : : \* .. . \*. \* :..... .

h AVPGVLGGLGALGGVGIPGGVVGAGPAAAAAATAAKAAQFGLVGAAGLGGLVGGGLG-  
p LKPGAAG-LPFVGGAGLQPGAGLQLPTGIGAGLKPGKIGAGVGLGGVPGVPGAGLGGGLG  
\* . \* \* :\*\*\*: \* . \*:.. \*. \*.. \*. \*\* \*.\*: \* \*:\*\*\*

h VPGVGGGLGGIPAAAAKAAKYGAAGLGGVLGGAGQFPLG---GVAARPGFGLSPIFPGGA  
p VPGGAGVGGVGVPGVPGAGIGGLGYPAGARYPGGIKPKPGYGAGVLPFGFGYSPIAPGLA  
\*\*\* .\*:\*\*: ..... \* . \* . \*. \* . \* \* \*.. \*\*\*\* \*\* \*\* \*

h CLG-----KACGRKRK  
p SQLGYPAKPKPSYGGALNLLAAYRGGYPCGAGLCKGRK-  
\* \*\*\*\*:
