# Supplementary material
Source: MDPI journal article supplement (https://www.mdpi.com/2221-3759/11/3/35)
Supplement: s1 [file s1]

## A) Comparison Osteonectin in *Bos taurus* (b, NP\_776889.1) and oestonectin in *Protopterus annectens* (p, XP\_43925350)

```

b      MRAWIFFLLCLAGRALAAP-----QQEALPDETEVVEETVAEVAEVPVGANPVQV
p      MRVFLLLFFVLVSKTLAVPPIDVQEEAVFDTDQVVLDEPAAEEEVVEIEEPTVGANPVQV
      **.:::: *.:*:**.*      : : : : ..** *.*: * .*****

b      EVGEFDDGAEETEEVVVAENPCQNHCKHKGKVCELDENNTPMCVCQDPTSCPAPIGEFEK
p      ETDDFEE-PEETVEEVVAENPCLNHCKHKGKVCEDENNMPMCVCQDPSTCPTATGEFEH
      *.:*:*: .*** ***** **.*:*****:**** *****:***. *****:

b      VCSNDNKTFDSSCHFFATKCTLEGTKKGHLHLDYIGPCKYIPPCLDSELTEFPLMRDW
p      VCGNDNKTYDSSCHFFATKCTLEGTKKGHLHLDYIGPCKYIPPCMDNELSEFPFRMRDW
      **.*:****:*****:*****:*****:****.*:***:*****

b      LKNVLVTLYERDEDNNLLTEKQKLRVKKIHENEKRLEAGCDHPVELLARDFEKNYNMYIF
p      LKNVLVTMFERDEENNLLTEKQKLRVKKIFENEKRLSAG-DHSIDLLTDFVKNYNMYIF
      *****:****:*****:*****.******.* **.:*:** *****

b      PVHWQFGQLDQHPIDGYLSHTELAFLAPLIPMEHCCTRFFETCDLDNDKYIALDEWAGC
p      PVHWQFGQLDQHPVDGYLSHTELAFLAPLIPMEHCCTRFFTECDTSDRYIALEEWAAAC
      *****:*****:***** ** *.*:****:***.*

b      FGIKEKDIDKDLVI
p      FGIKEQDIDKNLVI
      *****:****:***

```

## B) Comparison between Human Alkaline phosphatase (AAB59378.1) and Alkaline phosphatase in *Protopterus annectens* (p, XP\_043926613.1)

```

h      MISPFVLVAIGTCLTNSLVPEKEKDPKYWRDQAQETLKYALELQKLNTNVAKNVIMFLGD
p      -----

h      GMGVSTVTAARILKGQLHHNPGEETRLEMDKFPFVALSKTYNTNAQVPDSAGTATAYLCG
p      -MGVTTVTAARILKGQLEGQSGEESLTMDTFPNIALSKTYNVDYQVPDSAGTATAYLCG
      ***:*****. :.*** * **.*:*****.: *****

h      VKANEGTVGVSAATERSRCNTTQGNEVTSILRWAKDAGKSVGIVTTTRVNHATPSAAYAH
p      VKGNYGTIGLNAKAKRYQCSTSKGNEVTSILKRAKDAGKSVGIVTTTRVQHASPAGAYAH
      **.* **:*. * :.* :*.*:*****: *****:***:*.****

h      SADRWDYSDNEMPPEALSQGCKDIAYQLMHNIRDIDVIMGGGRKMYPKNKTDVEYESDE
p      ISDRWDYGDADMPADAISSGCKDIAYQLVHNG-DINVILGGGRKMYFPAGTPDPEYPS
      :*****.* :*.*:*.*****:*** **:*:*****:*. ...* ** *:.

h      KARGTRLDGLDLVDTWKSFKPRYKHSFIWNRTELLTLDPHNVDYLLGLFEPGDMQYELN
p      SKAATRKDNRTLVDNLSSR--KKAIVVWKKADFDVDESTTDYLMGLFEPGDMKYELN
      . .** * . **: * * : *:: :::: :.* ..***:*****:***

h      RNNVTDPSLSEMVVAIQILRKNPKGFLLVEGGRIDHGHHEGKAKQALHEAVEMDRAIG
p      RDKTMDPSIVEMTEKAIKILHKNPKGFFLFVEGGRIDHGHHTKAKMALTEAVLFDQAIAK
      *:.. ***: **. **:*:*****:*****: *** ** *** :*:**

h      QAGSLTSSDRTLTVVTADHSHVFTFGGYTPRGNSIFGLAPMLSDTDKKPFTAILYGNPGP
p      RASELTSESRTLTVVTADHSHVFTFGGYTVRGNPIFGLASSVAS-DKKNFTSILYGNPGP
      :*.***.***** ***** **.*:*****

h      YKVVGGERENVSMDVYAHNNYQAQSAVPLRHETHGGEDVAVFSKGPMAHLLHGVHEQNYV
p      YANTSEGRPNVNANTGENKDYMQQTAVPLDSETHGGEDVAIFSKGPMAHLLHGVQEQSYI
      * .. * ** . :*: * :**** *****:*****:***.*:

h      PHVMAYAACIG---ANLGHCAPASSAGSLAAGPLLLALALYPLSVLF--
p      PHVMFAACIEPYTDCNLGNASSQQFPTKCSWSALIAFVILLTEKIMS
      *****:**** .***: *.:.. : .: .*:*: * : :

```
