# Supplementary material
Source: MDPI journal article supplement (https://www.mdpi.com/2221-3759/11/3/35)
Supplement: s1 [file s1]

Comparison between rat nestin (r, P21263, aa 1-326) and nestin from *Protopterus annectens* (p, XP\_043935726.1, aa 1-360)

```

r      -----MEGCVGEESFQMWELNRRLEAYLTRVKTL EEQNQLLSAELGGLRAQSGDTSWRA
p      MER SMRRNQTMGTESQQMYELNKRLEGYLSRVKFLEQENELLKEEIQELQLEQSKTSWKN
          :  :* ** ** :***:***.**:*** **::*:**.*:  *:  :...***:

r      RADDELASLRILVDQRWREKLEAEVQRDNLAEELESVAGRCQQVRLARERTVQEAACSRR
p      EYQKELRALRESLDELYRDKSQTELERDRMYDELLLMKDRWQKEKQEQLVKQKVKESKQ
          .  :.* ** :**  :*: **: * :*:**.: **:  :.* **: :  :* . **.* **:

r      ALEAEKNARGWLSTQAAELERELEALRAAHEEERAHNAQAACAPR--RPPAPPHGSPVR
p      ELEEE TRAHNWLKQKAFQLEDELQLLQDAHEEEKLSLQQEVSERSYSFTELRPAHTPAYP
          ** *..*:... :* :** **: *: *****: *: :.:  .          *.* ..

r      APEVEDLARRLGEVWRGAVRDYQERVAHMESSLGQARERLSQAVRGARECRLEVQQLQAD
p      AIEVQEYTSQLSEIWKGAVRSYQEEIDQMEASLQDAKDQLQSIAREKKEAYQLLQNLQRE
          * **:::  : :*.*:*:*****.***.: :*:** :*:**:.. .*  :*.  :*:** :

r      RDSLQERREALEQRLEGRWQDRLQATDKFQLAVEALEQEKQGLQSQIAQIILEGGQQLAHL
p      LDSLQVRKEMLEKSVMKHQQEQQDCRHEFQSEIDSMEDKEELRQQIVQILKDRQKLMEEL
          **** *: * **: :  : *: :. .: ** :*:** **: *: **.***:. *: * .*

r      KMSLSLEVATYRTLLEAENSRLQTPGRGSQASLG-----F
p      KMSLSLEVATYRSLLAE S IRLQPFMEYSPASVIRDTKLDIKSNKPPSLPNNITDVRKRF
          *****:*****. ****.  . * **:                               *

```
